# Supplementary material for: Wnt2 complements Wnt/β-catenin signaling in colorectal cancer
Source: PubMed Central journal article supplement (PMC4741928; doi:10.18632/oncotarget.6133), 2015-10-15
Supplement: oncotarget-06-37257-s001.pdf [file oncotarget-06-37257-s001.pdf]

# Wnt2 complements Wnt/ $\beta$ -catenin signaling in colorectal cancer

## Supplementary Material

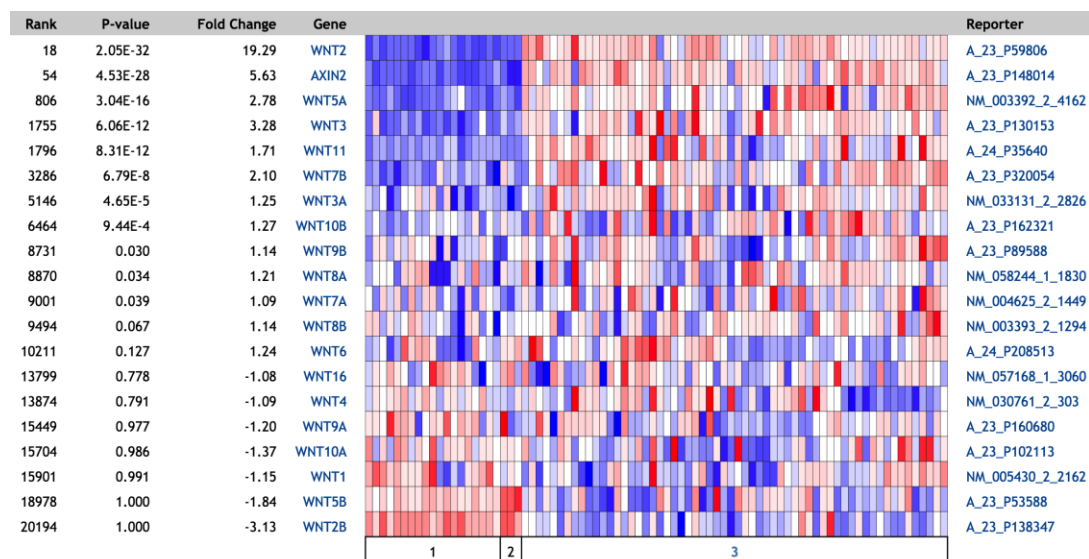

### Supplementary Figure 1. Correlation between Wnt ligands and *AXIN2* expression

OncoPrint analysis of TCGA dataset (TCGA Colorectal, 237 samples, 20,423 measured genes); colon (19), rectum (3), and rectal adenocarcinoma (60); downregulation (blue), upregulation (red). *WNT2* (the first row; 19.29 fold increase) and *AXIN2* (the second row; 5.63 fold increase) display the highest expression in CRC cells, with the significantly low P values (2.05E-32 and 4.53E-28, respectively).

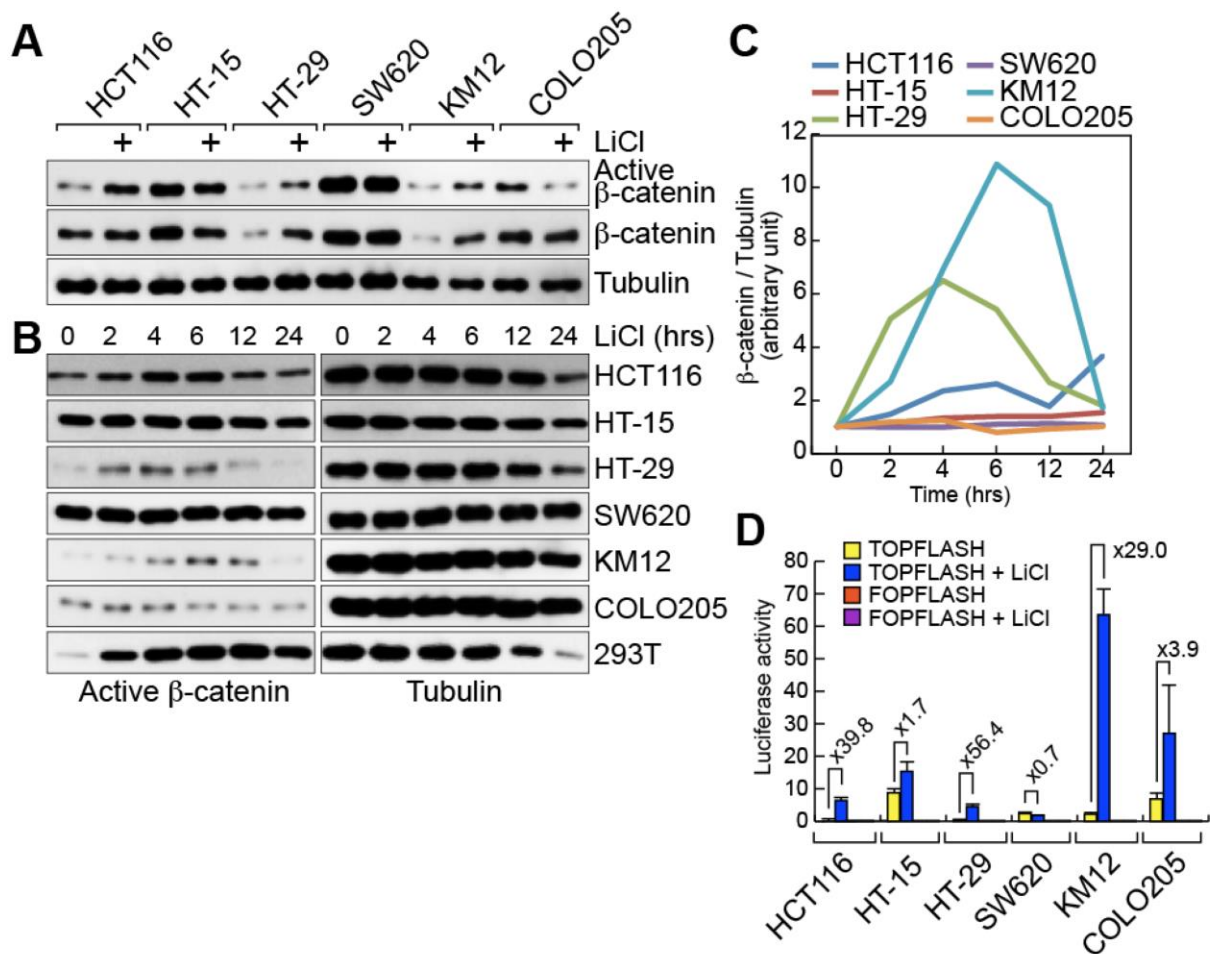

**Supplementary Figure 2. Stabilization of β-catenin by GSK3 inhibition in CRC cells**

(A~C) Stabilization of β-catenin by GSK3 inhibition in CRC cells. CRC cell lines were treated with LiCl (25 mM, 4 hours) and subjected to IB assays. LiCl treatment increases the level of active β-catenin as well as total β-catenin (A), also in a time-dependent manner (B). Kinetics of β-catenin protein stabilization by LiCl was plotted. Images were quantified using ImageJ (C). (D) β-catenin reporter activation by LiCl in CRC cells. CRC

cells were transfected with  $\beta$ -catenin reporter plasmids (TOPFLASH or FOPFLASH). 24 hours after transfection, cells were treated with LiCl (25 mM, 4 hours). 24 hours after LiCl, cells were collected for luciferase assays.

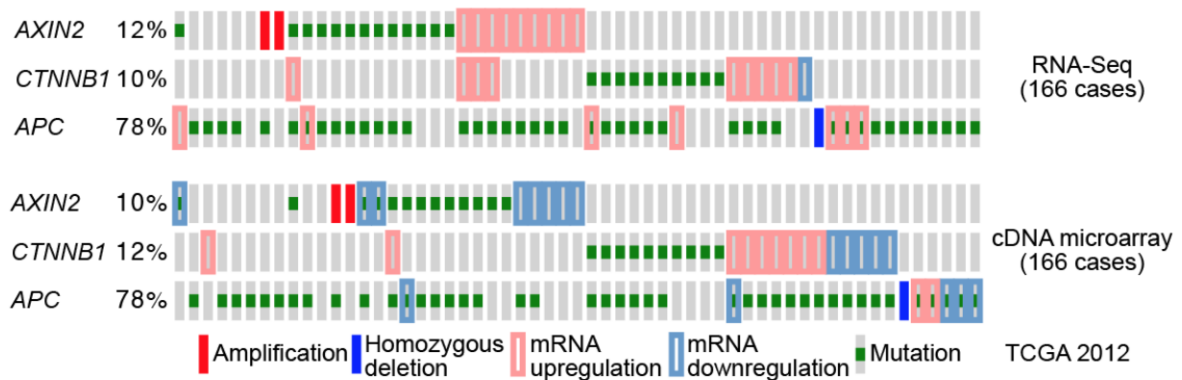

### Supplementary Figure 3. Mutually exclusive gene alteration among Wnt signaling components

cBioPortal analysis of TCGA 2012 colorectal carcinoma data sets. 166 patient/case sets. Genome profiles: mutation, copy number alterations from GISTIC, and mRNA expression x-Scores (RNA-Seq V2 RSEM). It is noteworthy that CRC patient samples harboring genetic mutations or mRNA upregulation of *CTNNB1* or *AXIN2* also contain *APC* mutation.

| <b>Cell line</b> | <b>APC</b> | <b>CTNNB1</b> | <b>AXIN1</b> | <b>BRAF</b> | <b>PTEN</b> | <b>K-Ras</b> | <b>p53</b>   |
|------------------|------------|---------------|--------------|-------------|-------------|--------------|--------------|
| HCT116           | WT         | ΔS45          | WT           | WT          | WT          | G13D         | WT           |
| HT-29            | E853X      | WT            | WT           | V600E       | WT          | WT           | R273H        |
| HCT-15           | I1417fs    | WT            | WT           | WT          | WT          | G13D         | S241F        |
| SW620            | Q1338X     | WT            | WT           | WT          | WT          | G12V         | R273H, P309S |
| KM12             | N1818fs    | WT            | E640fs (Del) | WT          | G129X       | WT           | H179R        |
| COLO205          | E1554fs    | WT            | -            | V600E       | WT          | WT           | G266E        |

#### Supplementary Figure 4. Genetic mutations in CRC cell lines

WT: wild-type; Del: deletion; fs: frame-shift; X: stop codon (termination).

| Gene   | JARID2 | AEBP2    | EZH2     | EED      | SUZ12    | Wnt2     | RBBP7    | RBBP4    |
|--------|--------|----------|----------|----------|----------|----------|----------|----------|
| JARID2 | -      | 0.000834 | 0.12952  | 0.718848 | 0.643482 | 0.574192 | 0.369384 | 0.00719  |
| AEBP2  |        | -        | 0.354056 | 0.65317  | 0.000671 | 0.594107 | 0.648737 | 0.842242 |
| EZH2   |        |          | -        | 0.053337 | 0.595414 | 0.614593 | 0.048378 | 0.148295 |
| EED    |        |          |          | -        | 0.140013 | 0.679618 | 0.274565 | 0.119588 |
| SUZ12  |        |          |          |          | -        | 0.702526 | 0.254302 | 0.890087 |
| Wnt2   |        |          |          |          |          | -        | 0.853921 | 0.939255 |
| RBBP7  |        |          |          |          |          |          | -        | 0.949247 |
| RBBP4  |        |          |          |          |          |          |          | -        |

*p* values are indicated in each cell

Strong tendency towards mutual exclusivity (0 < odds ratio < 0.1)

No association (0.5 < odds ratio < 2)

Tendency toward co-occurrence (2 < odds ratio < 10)

Strong tendency toward co-occurrence (odds ratio > 10)

www.cbioportal.org

TCGA 2012, colorectal adenocarcinoma

Patient/case set: Tumor CNA (195)

Genome profiles:

mutations

copy number alterations from GISTIC

mRNA expression z-Scores (RNA-Seq V2 RSEM)

## Supplementary Figure 5. Mutually exclusive gene alteration between PRC2 and WNT2

cBioPortal analysis of TCGA 2012 colorectal carcinoma data sets. 195 patient/case sets. Genome profiles: mutation, copy number alterations from GISTIC, and mRNA expression x-Scores (RNA-Seq V2 RSEM). P values are indicated in each cell. Red: strong tendency toward mutual exclusivity; empty: no association; yellow: tendency toward co-occurrence; green: strong tendency toward co-occurrence.
